# Supplementary material
Source: Research Square preprint supplement (doi:10.21203/rs.3.rs-8968676/v1)
Supplement: Supplementary file 1 [file dbe1176546074dcb12ddb747.docx]

SUPPLEMENTAL INFORMATION

| Cluster and scenario | Wet season | Dry season |
| --- | --- | --- |
| 1 - RCP4.5 | 2.81 | -2.25 |
| 2 - RCP4.5 | 5.48 | -2.5 |
| 3 - RCP4.5 | -0.21 | -0.53 |
| 4 - RCP4.5 | 20.58 | -4.53 |
| 1-RCP8.5 | 5.52 | -6.9 |
| 2-RCP8-5 | 7.38 | -8.94 |
| 3-RCP8-5 | 2.17 | -6.93 |
| 4-RCP8-5 | 18.74 | -10.52 |

Table S1 Percentage deviation of precipitation from historical values.
Historical seasonal precipitation for the time interval 1981-2010 as a sum of average recorded precipitation from May to September (wet season) and October to April (dry season). Projected precipitation patterns for RCP4.5 and RCP8.5 were taken from the GFDL - ESM4 climate model and represent the average seasonal precipitation for the time interval 2011-2040. The percentage deviation was calculated as the difference between the projected climate change scenario value and historical value.

Table S Evapotranspiration in Bm3/103km2 across farming types and clusters for each scenario and season.

|  |  |  | Growing |  |  | Harvesting | |  |
| --- | --- | --- | --- | --- | --- | --- | --- | --- |
| Crop | Type | Cluster | Baseline | RCP4.5 | RCP8.5 | Baseline | RCP4.5 | RCP8.5 |
| Sorghum | Low Rainfed | 4 | 0.09 | 0.1 | 0.586 | 0.0721 | 0.095 | 0.12 |
| Sorghum | High Rainfed | 4 | 0.098 | 0.08 | 0.75 | 0.0549 | 0.134 | 0.155 |
| Sorghum | Low Irrigated | 4 | 0.1071 | 0.125 | 0.503 | 0.0535 | 0.062 | 0.152 |
| Sorghum | High Irrigated | 4 | 0.0759 | 0.082 | 0.591 | 0.0379 | 0.041 | 0.196 |
| Wheat | Low Rainfed | 4 | 0.0117 | 0.028 | 0.75 | 0.0025 | 0.006 | 0.1 |
| Wheat | High Rainfed | 4 | 0.0025 | 0 | 0.709 | 0.0005 | 0 | 0.154 |
| Wheat | Low Irrigated | 4 | 0.0457 | 0.055 | 0.616 | 0.0099 | 0.012 | 0.134 |
| Wheat | High Irrigated | 4 | 0.0383 | 0.011 | 0.559 | 0.0083 | 0.002 | 0.122 |
| Cereals | Low Rainfed | 4 | 0.09 | 0.101 | 0.014 | 0.0491 | 0.06 | 0.004 |
| Cereals | High Rainfed | 4 | 0.098 | 0.11 | 0.088 | 0.033 | 0.078 | 0.026 |
| Cereals | Low Irrigated | 4 | 0.0642 | 0.085 | 0.013 | 0.0192 | 0.025 | 0.004 |
| Cereals | High Irrigated | 4 | 0.0529 | 0.064 | 0.055 | 0.0159 | 0.019 | 0.016 |
| Barley | Low Rainfed | 4 | 0.0104 | 0.026 | 0.8 | 0.0018 | 0.005 | 0.139 |
| Barley | High Rainfed | 4 | 0.0007 | 0 | 0.709 | 0.0001 | 0 | 0.123 |
| Barley | Low Irrigated | 4 | 0.0508 | 0.06 | 0.651 | 0.0088 | 0.01 | 0.113 |
| Barley | High Irrigated | 4 | 0.045 | 0.016 | 0.55 | 0.0078 | 0.003 | 0.096 |
| Maize | Low Rainfed | 4 | 0.013 | 0.08 | 0.64 | 0.0046 | 0.028 | 0.124 |
| Maize | High Rainfed | 4 | 0.0076 | 0.104 | 0.895 | 0.0026 | 0.036 | 0.113 |
| Maize | Low Irrigated | 4 | 0.1173 | 0.137 | 0.577 | 0.0411 | 0.048 | 0.202 |
| Maize | High Irrigated | 4 | 0.0828 | 0.09 | 0.677 | 0.029 | 0.031 | 0.237 |
| Sorghum | Low Rainfed | 3 | 0.56 | 0.537 | 0.142 | 0.25 | 0.268 | 0.071 |
| Sorghum | High Rainfed | 3 | 0.54 | 0.5 | 0.215 | 0.27 | 0.281 | 0.107 |
| Sorghum | Low Irrigated | 3 | 0.5665 | 0.373 | 0.104 | 0.2833 | 0.187 | 0.052 |
| Sorghum | High Irrigated | 3 | 0.5505 | 0.235 | 0.065 | 0.2753 | 0.118 | 0.032 |
| Coffee | Low Irrigated | 3 | 0.6 | 0.728 | 0.167 | 0.3441 | 0.317 | 0.073 |
| Coffee | High Irrigated | 3 | 0.7246 | 0.866 | 0.329 | 0.315 | 0.377 | 0.143 |
| Wheat | Low Rainfed | 3 | 0.54 | 0.364 | 0.01 | 0.1599 | 0.079 | 0.002 |
| Wheat | High Rainfed | 3 | 0.56 | 0.157 | 0 | 0.1575 | 0.034 | 0 |
| Wheat | Low Irrigated | 3 | 0.5978 | 0.31 | 0.044 | 0.13 | 0.067 | 0.009 |
| Wheat | High Irrigated | 3 | 0.5436 | 0.142 | 0.011 | 0.1182 | 0.031 | 0.002 |
| Cereals | Low Rainfed | 3 | 0.1954 | 0.468 | 0.162 | 0.0586 | 0.14 | 0.048 |
| Cereals | High Rainfed | 3 | 0.1583 | 0.45 | 0.201 | 0.0475 | 0.135 | 0.06 |
| Cereals | Low Irrigated | 3 | 0.1655 | 0.316 | 0.06 | 0.0497 | 0.095 | 0.018 |
| Cereals | High Irrigated | 3 | 0.118 | 0.152 | 0.051 | 0.0354 | 0.046 | 0.015 |
| Barley | Low Rainfed | 3 | 0.55 | 0.363 | 0.009 | 0.1365 | 0.063 | 0.001 |
| Barley | High Rainfed | 3 | 0.54 | 0.157 | 0 | 0.1252 | 0.027 | 0 |
| Barley | Low Irrigated | 3 | 0.6351 | 0.333 | 0.049 | 0.1105 | 0.058 | 0.008 |
| Barley | High Irrigated | 3 | 0.5348 | 0.15 | 0.012 | 0.093 | 0.026 | 0.002 |
| Maize | Low Rainfed | 3 | 0.56 | 0.55 | 0.009 | 0.2637 | 0.217 | 0.003 |
| Maize | High Rainfed | 3 | 0.54 | 0.53 | 0.031 | 0.2589 | 0.23 | 0.011 |
| Maize | Low Irrigated | 3 | 0.6569 | 0.416 | 0.114 | 0.2299 | 0.146 | 0.04 |
| Maize | High Irrigated | 3 | 0.6273 | 0.26 | 0.071 | 0.2195 | 0.091 | 0.025 |
| Sorghum | Low Irrigated | 2 | 0.5153 | 0.553 | 0.535 | 0.2 | 0.22 | 0.168 |
| Sorghum | High Irrigated | 2 | 0.4643 | 0.584 | 0.589 | 0.2321 | 0.192 | 0.195 |
| Sorghum | Low Rainfed | 2 | 0.2951 | 0.412 | 0.34 | 0.1475 | 0.206 | 0.17 |
| Sorghum | High Rainfed | 2 | 0.1748 | 0.222 | 0.206 | 0.0874 | 0.111 | 0.103 |
| Coffee | Low Irrigated | 2 | 0.3803 | 0.779 | 0.667 | 0.1653 | 0.426 | 0.29 |
| Coffee | High Irrigated | 2 | 0.7208 | 0.864 | 0.894 | 0.3134 | 0.376 | 0.389 |
| Wheat | Low Rainfed | 2 | 0.2114 | 0.57 | 0.386 | 0.046 | 0.153 | 0.084 |
| Wheat | High Rainfed | 2 | 0.1403 | 0.55 | 0.142 | 0.0305 | 0.131 | 0.031 |
| Wheat | Low Irrigated | 2 | 0.159 | 0.505 | 0.302 | 0.0346 | 0.11 | 0.066 |
| Wheat | High Irrigated | 2 | 0.089 | 0.352 | 0.093 | 0.0194 | 0.077 | 0.02 |
| Cereals | Low Rainfed | 2 | 0.4432 | 0.538 | 0.454 | 0.133 | 0.161 | 0.136 |
| Cereals | High Rainfed | 2 | 0.4338 | 0.543 | 0.451 | 0.1302 | 0.163 | 0.135 |
| Cereals | Low Irrigated | 2 | 0.2383 | 0.377 | 0.28 | 0.0715 | 0.113 | 0.084 |
| Cereals | High Irrigated | 2 | 0.1486 | 0.202 | 0.149 | 0.0446 | 0.06 | 0.045 |
| Barley | Low Rainfed | 2 | 0.2084 | 0.59 | 0.387 | 0.0362 | 0.128 | 0.067 |
| Barley | High Rainfed | 2 | 0.1412 | 0.57 | 0.146 | 0.0246 | 0.109 | 0.025 |
| Barley | Low Irrigated | 2 | 0.1661 | 0.553 | 0.323 | 0.0289 | 0.096 | 0.056 |
| Barley | High Irrigated | 2 | 0.0949 | 0.417 | 0.098 | 0.0165 | 0.072 | 0.017 |
| Maize | Low Irrigated | 2 | 0.5 | 0.6 | 0.517 | 0.2 | 0.234 | 0.216 |
| Maize | High Irrigated | 2 | 0.4864 | 0.55 | 0.587 | 0.1702 | 0.245 | 0.2 |
| Maize | Low Rainfed | 2 | 0.3239 | 0.47 | 0.375 | 0.1133 | 0.165 | 0.131 |
| Maize | High Rainfed | 2 | 0.1902 | 0.245 | 0.227 | 0.0666 | 0.086 | 0.079 |
| Sorghum | Low Irrigated | 1 | 0.5631 | 0.66 | 0.613 | 0.2815 | 0.33 | 0.307 |
| Sorghum | High Irrigated | 1 | 0.5589 | 0.691 | 0.618 | 0.2795 | 0.346 | 0.309 |
| Sorghum | Low Rainfed | 1 | 0.4341 | 0.565 | 0.508 | 0.2171 | 0.282 | 0.254 |
| Sorghum | High Rainfed | 1 | 0.3177 | 0.497 | 0.365 | 0.1589 | 0.248 | 0.183 |
| Coffee | Low Irrigated | 1 | 1.0179 | 0.816 | 0.996 | 0.4425 | 0.355 | 0.433 |
| Coffee | High Irrigated | 1 | 0.899 | 0.844 | 0.956 | 0.3908 | 0.367 | 0.416 |
| Wheat | Low Rainfed | 1 | 0.666 | 0.732 | 0.71 | 0.1448 | 0.159 | 0.154 |
| Wheat | High Rainfed | 1 | 0.6709 | 0.698 | 0.692 | 0.1459 | 0.152 | 0.15 |
| Wheat | Low Irrigated | 1 | 0.5111 | 0.598 | 0.549 | 0.1111 | 0.13 | 0.119 |
| Wheat | High Irrigated | 1 | 0.4388 | 0.548 | 0.474 | 0.0954 | 0.119 | 0.103 |
| Cereals | Low Rainfed | 1 | 0.5309 | 0.221 | 0.472 | 0.1593 | 0.066 | 0.142 |
| Cereals | High Rainfed | 1 | 0.528 | 0.37 | 0.534 | 0.1584 | 0.111 | 0.16 |
| Cereals | Low Irrigated | 1 | 0.3935 | 0.19 | 0.368 | 0.1181 | 0.057 | 0.11 |
| Cereals | High Irrigated | 1 | 0.2357 | 0.201 | 0.267 | 0.0707 | 0.06 | 0.08 |
| Barley | Low Rainfed | 1 | 0.6922 | 0.781 | 0.752 | 0.1204 | 0.136 | 0.131 |
| Barley | High Rainfed | 1 | 0.6776 | 0.694 | 0.704 | 0.1178 | 0.121 | 0.122 |
| Barley | Low Irrigated | 1 | 0.5588 | 0.638 | 0.598 | 0.0972 | 0.111 | 0.104 |
| Barley | High Irrigated | 1 | 0.4888 | 0.559 | 0.518 | 0.085 | 0.097 | 0.09 |
| Maize | Low Rainfed | 1 | 0.6834 | 0.758 | 0.733 | 0.2392 | 0.265 | 0.257 |
| Maize | High Rainfed | 1 | 0.6523 | 0.82 | 0.742 | 0.2283 | 0.287 | 0.26 |
| Maize | Low Irrigated | 1 | 0.495 | 0.656 | 0.589 | 0.1732 | 0.229 | 0.206 |
| Maize | High Irrigated | 1 | 0.3529 | 0.565 | 0.415 | 0.1235 | 0.198 | 0.145 |

Table S Potential crop yield for each scenario in Mton/103km2 across farming types and clusters.

| Crop | Type | Cluster | Baseline | RCP45 | RCP85 |
| --- | --- | --- | --- | --- | --- |
| Sorghum | Low Irrigated | 1 | 0.252871 | 0.254 | 0.262 |
| Sorghum | High Rainfed | 1 | 0.645671 | 0.55 | 0.707 |
| Sorghum | Low Rainfed | 1 | 0.284771 | 0.285 | 0.292 |
| Sorghum | High Rainfed | 1 | 0.829871 | 0.585 | 0.751 |
| Coffee | Low Irrigated | 1 | 0.066746 | 0.067 | 0.062 |
| Coffee | High Irrigated | 1 | 0.261646 | 0.203 | 0.257 |
| Wheat | Low Rainfed | 1 | 0.263645 | 0.403 | 0.331 |
| Wheat | High Rainfed | 1 | 0.568445 | 0.882 | 0.629 |
| Wheat | Low Irrigated | 1 | 0.273445 | 0.273 | 0.341 |
| Wheat | High Irrigated | 1 | 0.645545 | 0.891 | 0.672 |
| Cereals | Low Rainfed | 1 | 0.213212 | 0.1 | 0.217 |
| Cereals | High Rainfed | 1 | 0.486912 | 0.363 | 0.501 |
| Cereals | Low Irrigated | 1 | 0.227412 | 0.227 | 0.233 |
| Cereals | High Irrigated | 1 | 0.568012 | 0.381 | 0.521 |
| Barley | Low Rainfed | 1 | 0.222212 | 0.389 | 0.3 |
| Barley | High Rainfed | 1 | 0.528512 | 0.907 | 0.596 |
| Barley | Low Irrigated | 1 | 0.271512 | 0.272 | 0.36 |
| Barley | High Irrigated | 1 | 0.597212 | 0.895 | 0.632 |
| Maize | Low Rainfed | 1 | 0.409313 | 0.361 | 0.397 |
| Maize | High Rainfed | 1 | 0.905813 | 0.949 | 1.064 |
| Maize | Low Irrigated | 1 | 0.472613 | 0.473 | 0.466 |
| Maize | High Irrigated | 1 | 1.233813 | 1.081 | 1.164 |
| Sorghum | Low Irrigated | 2 | 0.225371 | 0.293 | 0.241 |
| Sorghum | High Rainfed | 2 | 0.623071 | 0.908 | 0.747 |
| Sorghum | Low Rainfed | 2 | 0.310171 | 0.31 | 0.289 |
| Sorghum | High Rainfed | 2 | 0.960171 | 0.977 | 0.862 |
| Coffee | Low Irrigated | 2 | 0.032446 | 0.032 | 0.044 |
| Coffee | High Irrigated | 2 | 0.269346 | 0.278 | 0.259 |
| Wheat | Low Rainfed | 2 | 0.163645 | 0.9 | 0.366 |
| Wheat | High Rainfed | 2 | 0.188945 | 1.298 | 0.245 |
| Wheat | Low Irrigated | 2 | 0.185345 | 0.185 | 0.28 |
| Wheat | High Irrigated | 2 | 0.307245 | 0.767 | 0.172 |
| Cereals | Low Rainfed | 2 | 0.147112 | 0.313 | 0.313 |
| Cereals | High Rainfed | 2 | 0.358212 | 0.565 | 0.565 |
| Cereals | Low Irrigated | 2 | 0.169612 | 0.17 | 0.17 |
| Cereals | High Irrigated | 2 | 0.486212 | 0.578 | 0.578 |
| Barley | Low Rainfed | 2 | 0.197112 | 1.349 | 1.349 |
| Barley | High Rainfed | 2 | 0.197312 | 1.637 | 1.637 |
| Barley | Low Irrigated | 2 | 0.197112 | 0.197 | 0.197 |
| Barley | High Irrigated | 2 | 0.287912 | 0.791 | 0.791 |
| Maize | Low Rainfed | 2 | 0.312813 | 0.475 | 0.475 |
| Maize | High Rainfed | 2 | 0.629413 | 1.249 | 1.249 |
| Maize | Low Irrigated | 2 | 0.490113 | 0.49 | 0.49 |
| Maize | High Irrigated | 2 | 1.274413 | 1.327 | 1.327 |
| Sorghum | Low Irrigated | 3 | 0.252271 | 0.204 | 0.052 |
| Sorghum | High Rainfed | 3 | 0.455071 | 0.683 | 0.258 |
| Sorghum | Low Rainfed | 3 | 0.267671 | 0.268 | 0.352 |
| Sorghum | High Rainfed | 3 | 0.556471 | 0.814 | 1.055 |
| Coffee | Low Irrigated | 3 | 0.039446 | 0.039 | 0.039 |
| Coffee | High Irrigated | 3 | 0.168146 | 0.253 | 0.253 |
| Wheat | Low Rainfed | 3 | 0.331945 | 0.094 | 0.094 |
| Wheat | High Rainfed | 3 | 0.881945 | 0.111 | 0.111 |
| Wheat | Low Irrigated | 3 | 0.340545 | 0.341 | 0.341 |
| Wheat | High Irrigated | 3 | 0.938245 | 0.141 | 0.141 |
| Cereals | Low Rainfed | 3 | 0.130212 | 0.181 | 0.181 |
| Cereals | High Rainfed | 3 | 0.199412 | 0.429 | 0.429 |
| Cereals | Low Irrigated | 3 | 0.136712 | 0.137 | 0.137 |
| Cereals | High Irrigated | 3 | 0.263112 | 0.435 | 0.435 |
| Barley | Low Rainfed | 3 | 0.208812 | 0.049 | 0.049 |
| Barley | High Rainfed | 3 | 0.864912 | 0.094 | 0.094 |
| Barley | Low Irrigated | 3 | 0.344712 | 0.345 | 0.345 |
| Barley | High Irrigated | 3 | 0.905812 | 0.118 | 0.118 |
| Maize | Low Rainfed | 3 | 0.369513 | 0.346 | 0.346 |
| Maize | High Rainfed | 3 | 0.774913 | 0.869 | 0.869 |
| Maize | Low Irrigated | 3 | 0.411713 | 0.412 | 0.412 |
| Maize | High Irrigated | 3 | 1.067613 | 1.129 | 1.129 |
| Sorghum | Low Rainfed | 4 | 0.112271 | 0.145 | 0.1534 |
| Sorghum | High Rainfed | 4 | 0.209871 | 0.425 | 0.454 |
| Sorghum | Low Irrigated | 4 | 0.328471 | 0.328 | 0.1559 |
| Sorghum | High Irrigated | 4 | 1.021871 | 0.992 | 0.4633 |
| Wheat | Low Rainfed | 4 | 0.140445 | 0.375 | 0.2119 |
| Wheat | High Rainfed | 4 | 0.140245 | 0 | 0.7866 |
| Wheat | Low Irrigated | 4 | 0.172045 | 0.172 | 0.2194 |
| Wheat | High Irrigated | 4 | 0.258445 | 0.073 | 0.8154 |
| Cereals | Low Rainfed | 4 | 0.092212 | 0.12 | 0.004 |
| Cereals | High Rainfed | 4 | 0.148112 | 0.313 | 0.069 |
| Cereals | Low Irrigated | 4 | 0.170212 | 0.17 | 0.0044 |
| Cereals | High Irrigated | 4 | 0.515612 | 0.505 | 0.0714 |
| Barley | Low Rainfed | 4 | 0.166612 | 0.433 | 0.1912 |
| Barley | High Rainfed | 4 | 0.165812 | 0 | 0.7316 |
| Barley | Low Irrigated | 4 | 0.188012 | 0.188 | 0.197 |
| Barley | High Irrigated | 4 | 0.252212 | 0.069 | 0.7506 |
| Maize | Low Rainfed | 4 | 0.120213 | 1.034 | 0.2105 |
| Maize | High Rainfed | 4 | 0.122213 | 2.31 | 0.8037 |
| Maize | Low Irrigated | 4 | 0.512813 | 0.513 | 0.2271 |
| Maize | High Irrigated | 4 | 1.335913 | 1.297 | 0.931 |

Table S Biodiversity Habitat Index (BHI) per cluster and scenario for the time interval 2020 -2050

| Cluster | Baseline | RCP4.5 | RCP4.5_IRR | RCP8.5 | RCP8.5_IRR | UNIT | YEAR |
| --- | --- | --- | --- | --- | --- | --- | --- |
| C01 | 70.743 | 70.743 | 70.743 | 70.743 | 70.743 | % | 2020 |
| C01 | 74.962 | 74.95 | 74.95 | 74.952 | 74.95 | % | 2021 |
| C01 | 76.796 | 76.64 | 76.909 | 76.76 | 76.64 | % | 2022 |
| C01 | 78.321 | 78.748 | 78.372 | 78.159 | 78.175 | % | 2023 |
| C01 | 78.516 | 78.944 | 78.568 | 78.354 | 78.37 | % | 2024 |
| C01 | 78.712 | 79.141 | 78.763 | 78.549 | 78.565 | % | 2025 |
| C01 | 78.908 | 79.338 | 78.959 | 78.745 | 78.76 | % | 2026 |
| C01 | 79.104 | 79.536 | 79.156 | 78.941 | 78.957 | % | 2027 |
| C01 | 79.301 | 79.734 | 79.353 | 79.137 | 79.153 | % | 2028 |
| C01 | 79.499 | 79.932 | 79.551 | 79.334 | 79.35 | % | 2029 |
| C01 | 79.697 | 80.131 | 79.749 | 79.532 | 79.548 | % | 2030 |
| C01 | 79.895 | 80.331 | 79.948 | 79.73 | 79.746 | % | 2031 |
| C01 | 80.094 | 80.531 | 80.147 | 79.929 | 79.945 | % | 2032 |
| C01 | 80.294 | 80.732 | 80.346 | 80.128 | 80.144 | % | 2033 |
| C01 | 80.494 | 80.933 | 80.547 | 80.327 | 80.343 | % | 2034 |
| C01 | 80.694 | 81.134 | 80.747 | 80.527 | 80.544 | % | 2035 |
| C01 | 80.895 | 81.336 | 80.948 | 80.728 | 80.744 | % | 2036 |
| C01 | 81.097 | 81.539 | 81.15 | 80.929 | 80.945 | % | 2037 |
| C01 | 81.299 | 81.742 | 81.352 | 81.131 | 81.147 | % | 2038 |
| C01 | 81.501 | 81.946 | 81.555 | 81.333 | 81.349 | % | 2039 |
| C01 | 81.704 | 82.15 | 81.758 | 81.535 | 81.552 | % | 2040 |
| C01 | 81.908 | 82.354 | 81.961 | 81.738 | 81.755 | % | 2041 |
| C01 | 82.112 | 82.559 | 82.166 | 81.942 | 81.958 | % | 2042 |
| C01 | 82.316 | 82.765 | 82.37 | 82.146 | 82.163 | % | 2043 |
| C01 | 82.521 | 82.971 | 82.575 | 82.351 | 82.367 | % | 2044 |
| C01 | 82.727 | 83.178 | 82.781 | 82.556 | 82.572 | % | 2045 |
| C01 | 82.933 | 83.385 | 82.987 | 82.761 | 82.778 | % | 2046 |
| C01 | 81.876 | 83.593 | 83.194 | 82.967 | 82.984 | % | 2047 |
| C01 | 80.833 | 83.801 | 83.401 | 83.174 | 83.191 | % | 2048 |
| C01 | 79.803 | 84.01 | 83.609 | 83.381 | 83.398 | % | 2049 |
| C01 | 78.786 | 84.219 | 83.817 | 83.589 | 83.606 | % | 2050 |
| C02 | 70.72 | 70.72 | 70.72 | 70.72 | 70.72 | % | 2020 |
| C02 | 90.708 | 85.351 | 90.119 | 92.326 | 92.326 | % | 2021 |
| C02 | 89.552 | 84.264 | 88.97 | 91.15 | 91.15 | % | 2022 |
| C02 | 88.411 | 83.19 | 87.837 | 89.989 | 89.989 | % | 2023 |
| C02 | 87.285 | 82.13 | 86.718 | 88.842 | 88.842 | % | 2024 |
| C02 | 88.356 | 81.084 | 85.613 | 87.71 | 89.932 | % | 2025 |
| C02 | 89.44 | 80.051 | 84.522 | 86.592 | 90.447 | % | 2026 |
| C02 | 90.538 | 79.031 | 84.861 | 85.489 | 90.132 | % | 2027 |
| C02 | 91.649 | 78.024 | 83.78 | 84.4 | 89.83 | % | 2028 |
| C02 | 92.326 | 77.03 | 82.712 | 83.325 | 89.534 | % | 2029 |
| C02 | 92.326 | 76.048 | 81.658 | 82.263 | 89.247 | % | 2030 |
| C02 | 92.326 | 75.079 | 80.618 | 81.215 | 89.573 | % | 2031 |
| C02 | 92.326 | 74.123 | 79.591 | 80.18 | 89.309 | % | 2032 |
| C02 | 92.326 | 73.178 | 78.576 | 79.158 | 89.056 | % | 2033 |
| C02 | 92.326 | 72.246 | 77.575 | 78.15 | 88.81 | % | 2034 |
| C02 | 92.326 | 71.325 | 76.587 | 77.154 | 88.573 | % | 2035 |
| C02 | 92.326 | 70.417 | 75.611 | 76.171 | 88.339 | % | 2036 |
| C02 | 92.326 | 69.519 | 74.648 | 75.2 | 88.246 | % | 2037 |
| C02 | 92.326 | 68.634 | 73.697 | 74.242 | 88.03 | % | 2038 |
| C02 | 92.326 | 67.759 | 72.758 | 73.296 | 90.152 | % | 2039 |
| C02 | 92.326 | 66.896 | 71.83 | 72.362 | 92.326 | % | 2040 |
| C02 | 92.326 | 66.043 | 70.915 | 71.44 | 92.326 | % | 2041 |
| C02 | 92.326 | 65.202 | 70.012 | 70.53 | 92.326 | % | 2042 |
| C02 | 92.326 | 64.371 | 69.12 | 69.631 | 92.326 | % | 2043 |
| C02 | 92.326 | 63.551 | 68.239 | 68.744 | 92.179 | % | 2044 |
| C02 | 92.326 | 62.741 | 67.369 | 67.868 | 92.036 | % | 2045 |
| C02 | 92.326 | 61.942 | 66.511 | 67.004 | 92.326 | % | 2046 |
| C02 | 92.326 | 61.153 | 65.664 | 66.15 | 92.326 | % | 2047 |
| C02 | 92.326 | 60.373 | 64.827 | 65.307 | 92.326 | % | 2048 |
| C02 | 92.326 | 59.604 | 64.001 | 64.475 | 92.326 | % | 2049 |
| C02 | 92.326 | 58.845 | 63.186 | 63.653 | 92.326 | % | 2050 |
| C03 | 70.717 | 70.717 | 70.717 | 70.717 | 70.717 | % | 2020 |
| C03 | 72.23 | 72.23 | 72.23 | 72.23 | 72.232 | % | 2021 |
| C03 | 76.723 | 77.12 | 76.691 | 76.64 | 76.712 | % | 2022 |
| C03 | 77.896 | 77.912 | 77.898 | 77.9 | 77.89 | % | 2023 |
| C03 | 78.353 | 78.353 | 78.353 | 78.363 | 78.353 | % | 2024 |
| C03 | 78.681 | 78.785 | 78.798 | 78.815 | 78.678 | % | 2025 |
| C03 | 79.002 | 79.206 | 79.232 | 79.255 | 79.03 | % | 2026 |
| C03 | 79.314 | 79.617 | 79.588 | 79.684 | 79.425 | % | 2027 |
| C03 | 79.618 | 80.019 | 80.005 | 80.102 | 79.812 | % | 2028 |
| C03 | 79.942 | 80.412 | 80.412 | 80.51 | 80.192 | % | 2029 |
| C03 | 80.126 | 80.739 | 80.81 | 80.81 | 80.565 | % | 2030 |
| C03 | 80.446 | 81.019 | 81.045 | 81.146 | 80.744 | % | 2031 |
| C03 | 80.694 | 81.238 | 81.275 | 81.378 | 80.952 | % | 2032 |
| C03 | 80.887 | 81.452 | 81.5 | 81.604 | 81.157 | % | 2033 |
| C03 | 81.077 | 81.662 | 81.721 | 81.826 | 81.359 | % | 2034 |
| C03 | 81.128 | 81.867 | 81.937 | 82.043 | 81.558 | % | 2035 |
| C03 | 81.449 | 82.069 | 82.148 | 82.256 | 81.754 | % | 2036 |
| C03 | 81.632 | 82.267 | 82.355 | 82.464 | 81.94 | % | 2037 |
| C03 | 81.812 | 82.462 | 82.558 | 82.668 | 82.13 | % | 2038 |
| C03 | 81.99 | 82.653 | 82.757 | 82.868 | 82.199 | % | 2039 |
| C03 | 82.166 | 82.84 | 82.952 | 83.065 | 82.255 | % | 2040 |
| C03 | 82.29 | 83.261 | 83.378 | 83.492 | 82.671 | % | 2041 |
| C03 | 82.169 | 83.673 | 83.797 | 83.91 | 83.079 | % | 2042 |
| C03 | 82.046 | 84.078 | 84.207 | 84.32 | 83.48 | % | 2043 |
| C03 | 81.921 | 84.4 | 84.608 | 84.722 | 83.882 | % | 2044 |
| C03 | 81.794 | 84.394 | 85.002 | 85.116 | 84.277 | % | 2045 |
| C03 | 81.666 | 84.297 | 85.389 | 85.503 | 84.494 | % | 2046 |
| C03 | 81.426 | 84.188 | 85.588 | 85.815 | 84.686 | % | 2047 |
| C03 | 81.173 | 84.077 | 85.704 | 86.015 | 84.874 | % | 2048 |
| C03 | 80.906 | 83.859 | 85.809 | 86.205 | 85.053 | % | 2049 |
| C03 | 80.62 | 83.564 | 85.902 | 86.391 | 85.224 | % | 2050 |
